# Supplementary material for: Podoplanin is a negative regulator of Th17 inflammation
Source: JCI journal article supplement (doi:10.1172/jci.insight.92321), 2017-09-06
Supplement: sd1 [file 1]

Supplementary Figures and Figure Legends

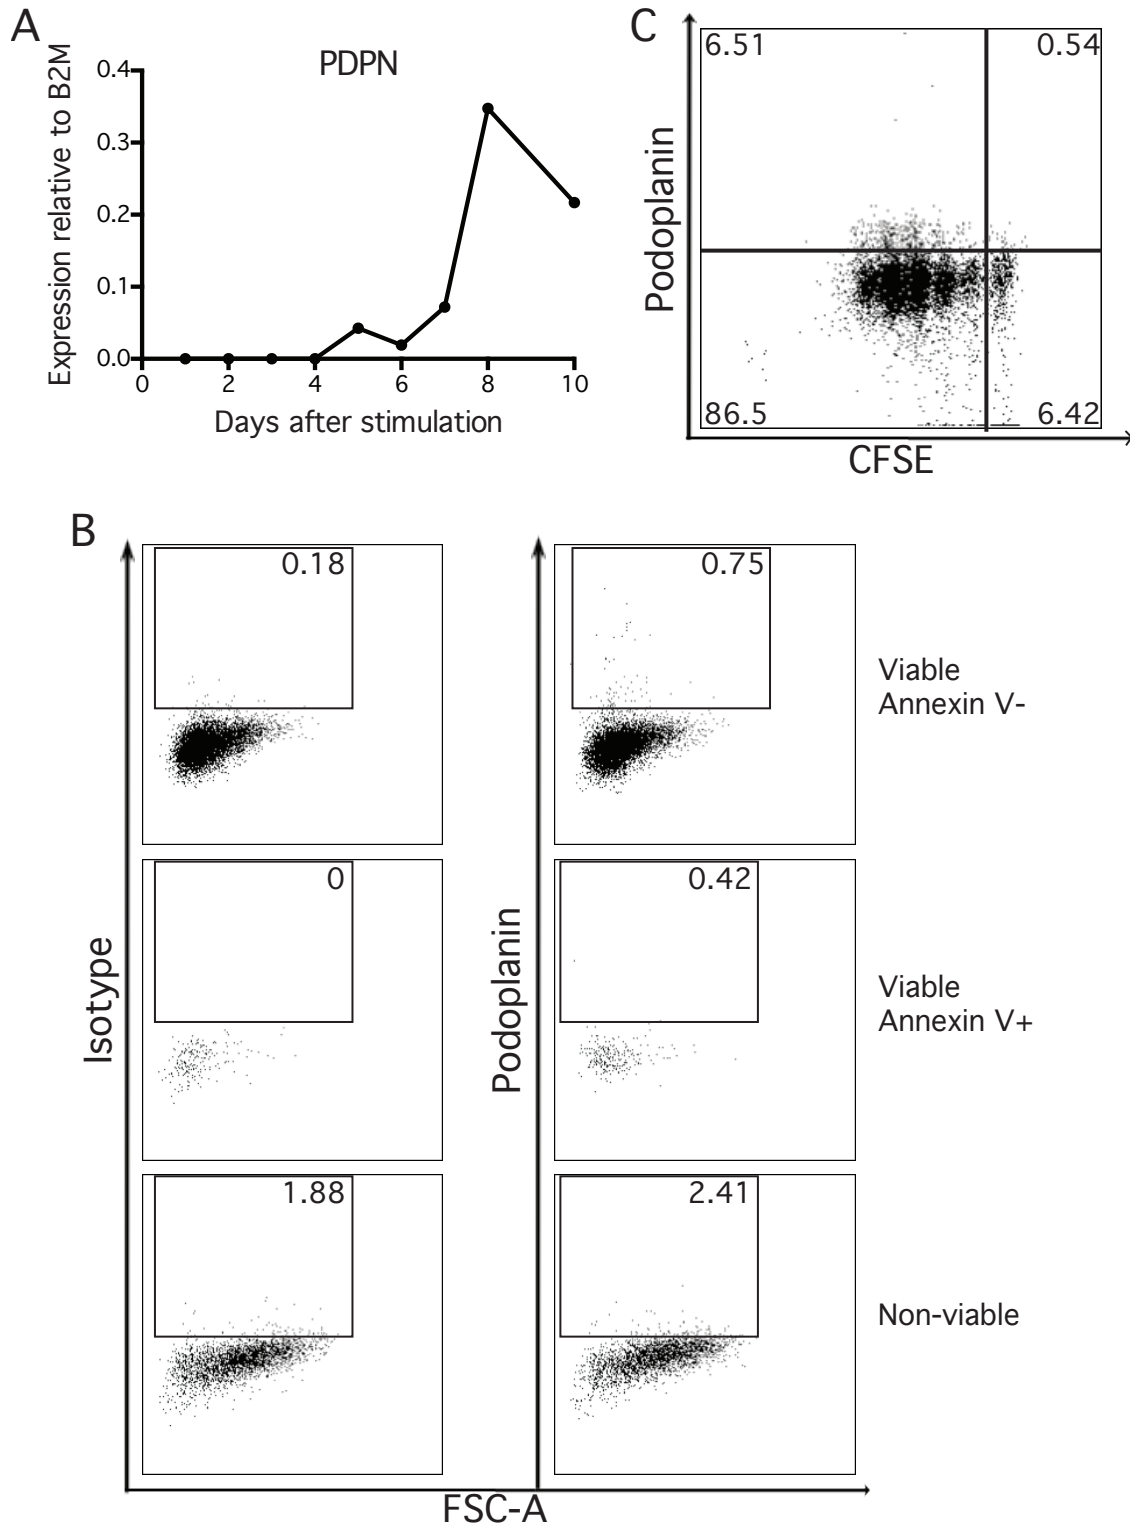

Supplementary Figure 1. PDPN is expressed late after stimulation on viable,

**proliferating CD4<sup>+</sup> T cells.** (A) After stimulation of naïve CD4<sup>+</sup> T cells under Th17 polarizing conditions, expression of *PDPN* relative to  $\beta$ 2M was measured by quantitative PCR every 24 hours over 10 days. (B) After 7 days of Th17 polarization cells were labeled with markers for viability, Annexin V, and PDPN or its isotype and then assessed by flow cytometry. (C) CD4<sup>+</sup> T cells were labeled with CFSE and then stimulated under Th17 conditions for 1 week to assess proliferation by CFSE dilution and PDPN expression on dividing cells. N = 3.

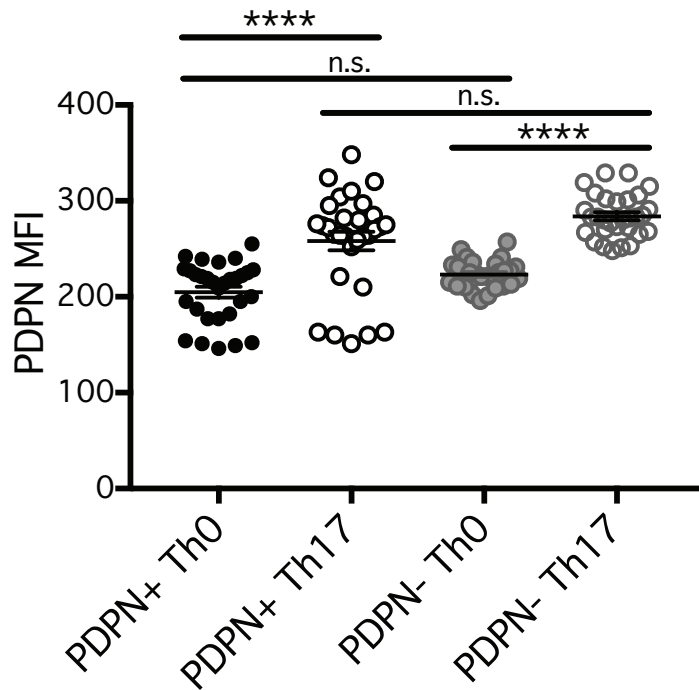

Supplementary Figure 2. **PDPN expression requires ongoing Th17 polarizing milieu.**

Naïve CD4<sup>+</sup> T cells were cultured under Th17 polarizing conditions for 1 week and then single PDPN<sup>+</sup> or PDPN<sup>-</sup> single cells were sorted onto allogeneic irradiated PBMCs. Cells were grown and expanded with IL-2 (Th0) or with IL-2 and Th17 polarizing cytokines (Th17) for 5 weeks and then evaluated for PDPN expression by flow cytometry. Data shown is mean fluorescent intensity (MFI). Data points represent individual clones. Comparisons pre-selected and then analyzed as one-way ANOVA with Sidak's multiple comparisons test. \*\*\*\*p < 0.0001. Graph shows mean ± SEM.

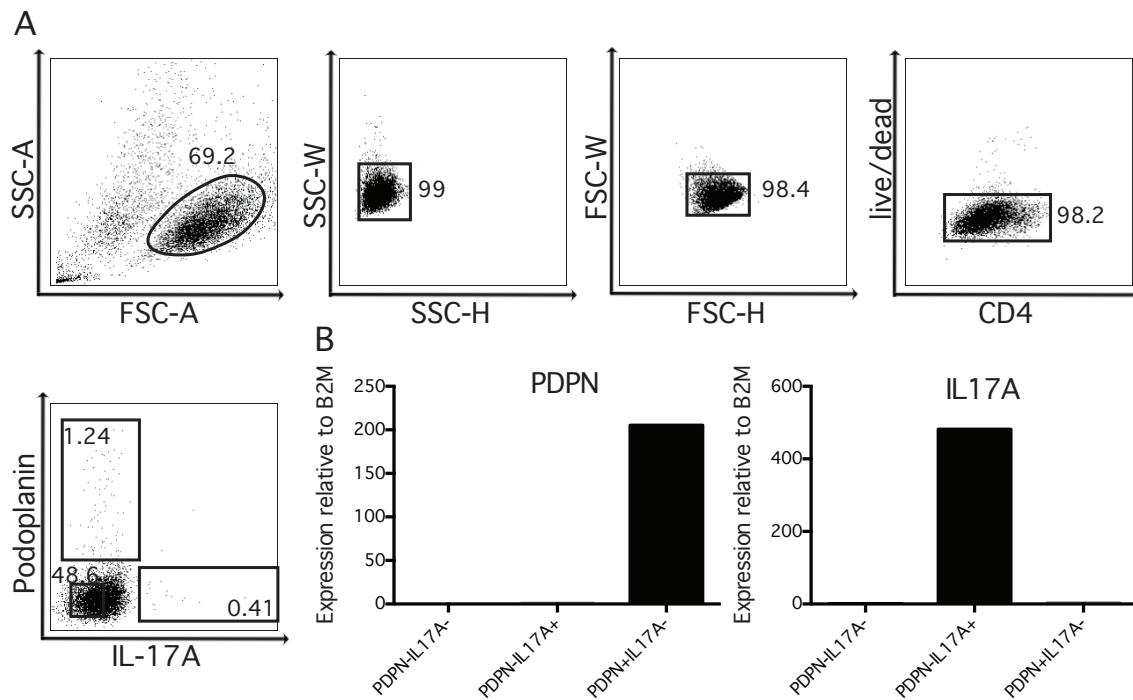

Supplementary Figure 3. **PDPN<sup>+</sup> and IL-17A<sup>+</sup> CD4<sup>+</sup> T cells identified by flow cytometry express appropriate mRNA prior to NanoString analysis.** (A) Naïve CD4<sup>+</sup> T cells were stimulated under Th17 polarizing conditions for 1 week before resorting based on PDPN and IL-17A cell surface expression. Stimulated cells were gated on lymphocytes, doublets were excluded, gated on viable CD4<sup>+</sup> cells, and gates were placed around the PDPN<sup>-</sup>IL17A<sup>-</sup>, PDPN<sup>+</sup>IL-17A<sup>-</sup>, and PDPN<sup>-</sup>IL17A<sup>+</sup> populations and sorted on a FACS Aria. (B) After sorting, gene expression relative to  $\beta$ 2M was verified by quantitative PCR. Representative example of 2 experiments.

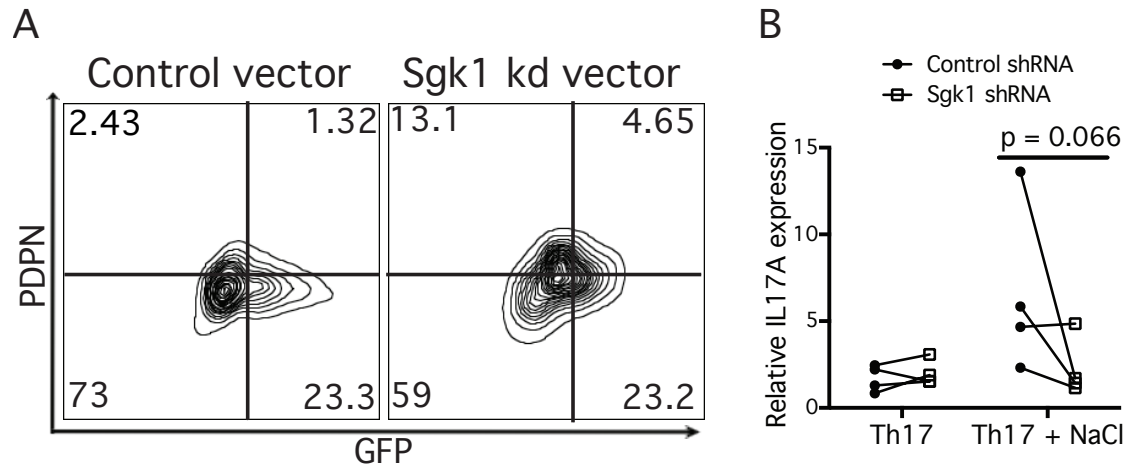

Supplementary Figure 4. **Sgk1 knockdown leads to reduction in IL-17A under high-salt Th17 conditions.** (A) CD4<sup>+</sup> T cells were stimulated under Th17 polarizing conditions with or without an additional 40 mM NaCl and infected with either Sgk1 shRNA or non-target control shRNA and then assessed by flow cytometry. Representative flow cytometry plot GFP expression was similar for Sgk1 and control shRNA, confirming similar levels of vector expression. (B) Gene expression was evaluated by quantitative PCR relative to  $\beta$ 2M. Analyzed by two-way ANOVA. Under high salt conditions Sgk1 knockdown led to a reduction in *IL17A* relative to  $\beta$ 2M though it did not reach statistical significance. N=4.

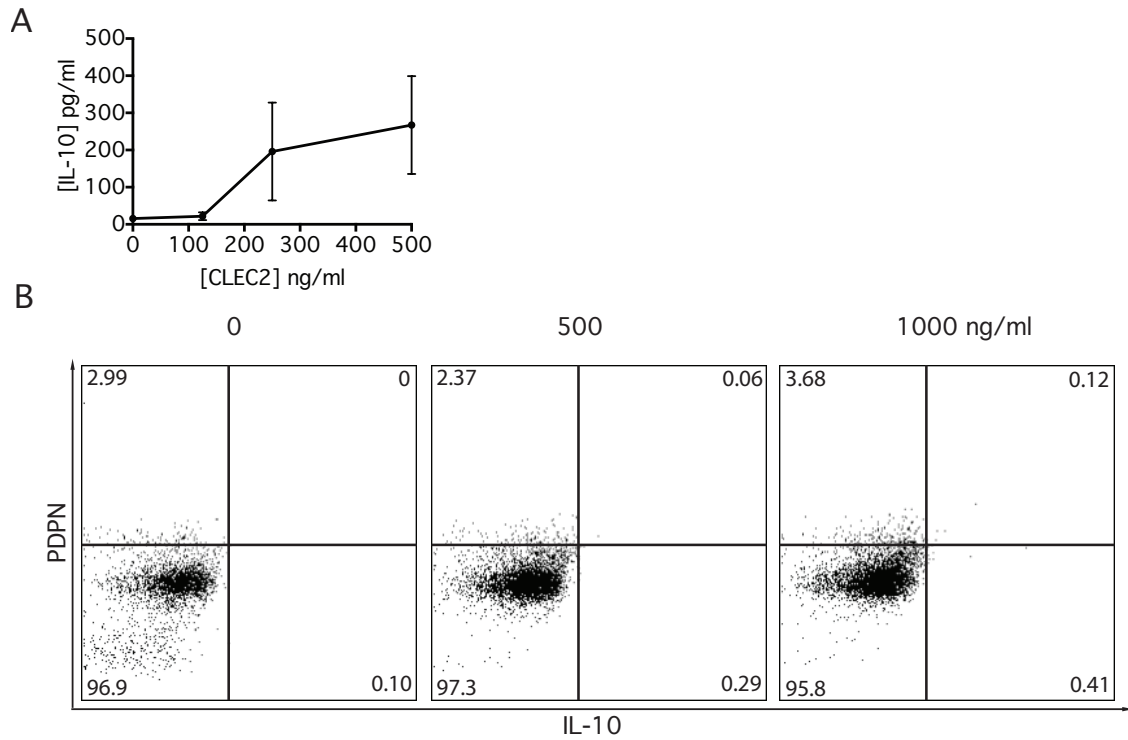

Supplementary Figure 5. **CLEC-2 leads to increased IL-10 production in Th17 polarized cell cultures.** (A) CD4<sup>+</sup> T cells were stimulated under Th17 polarizing conditions with varying concentrations of CLEC-2. IL-10 secretion was measured by ELISA on day 7. Graph shows means  $\pm$  SEM. N=7. (B) Representative example of flow cytometry for PDPN and IL-10 on day 4 with varying concentrations of CLEC-2.

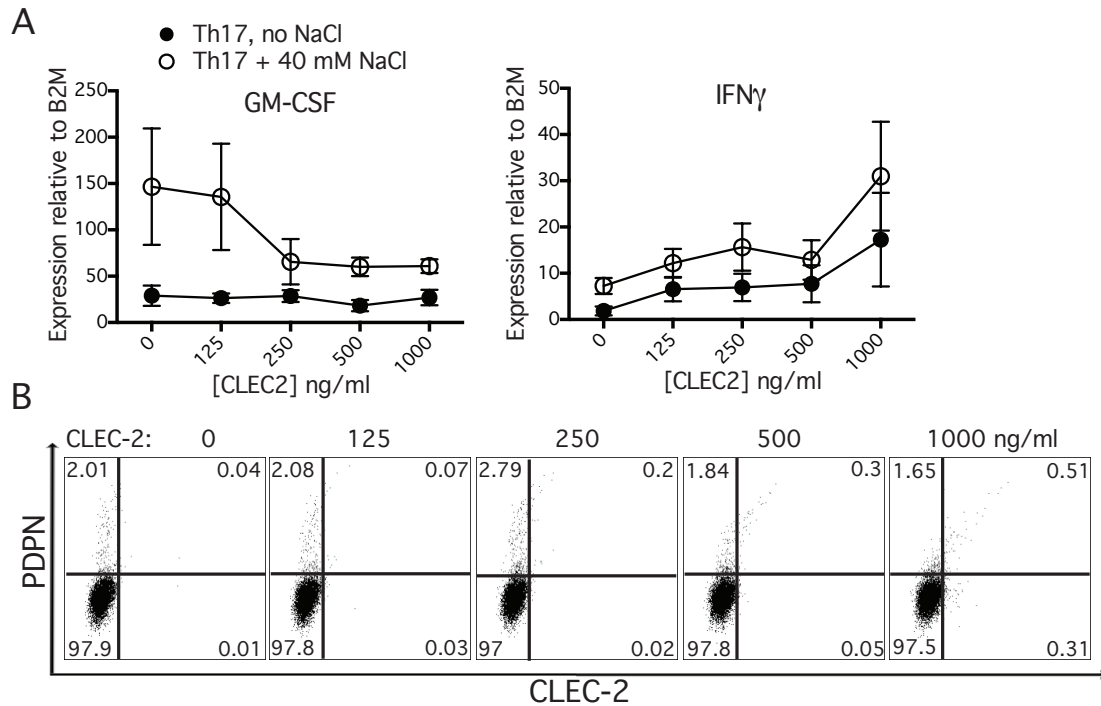

Supplementary Figure 6. **CLEC-2** ligation of **PDPN** led to changes in cytokine expression. **(A)** mRNA of cytokines relative to  $\beta$ 2M was assessed by quantitative PCR after 1 week of incubation under Th17 conditions with varying concentrations of CLEC-2. N=5. **(B)** CLEC-2 is shown to be co-localized with PDPN by flow cytometry as increasing concentrations of CLEC-2 are added to cultures. N=2. Graphs show mean  $\pm$  SEM.
